# Supplementary material
Source: PubMed Central journal article supplement (PMC8261863)
Supplement: NIHMS1716142-supplement-SI.pdf [file NIHMS1716142-supplement-SI.pdf]

Suppl. Figure 1: Urinary GAGs DMMB-Assay

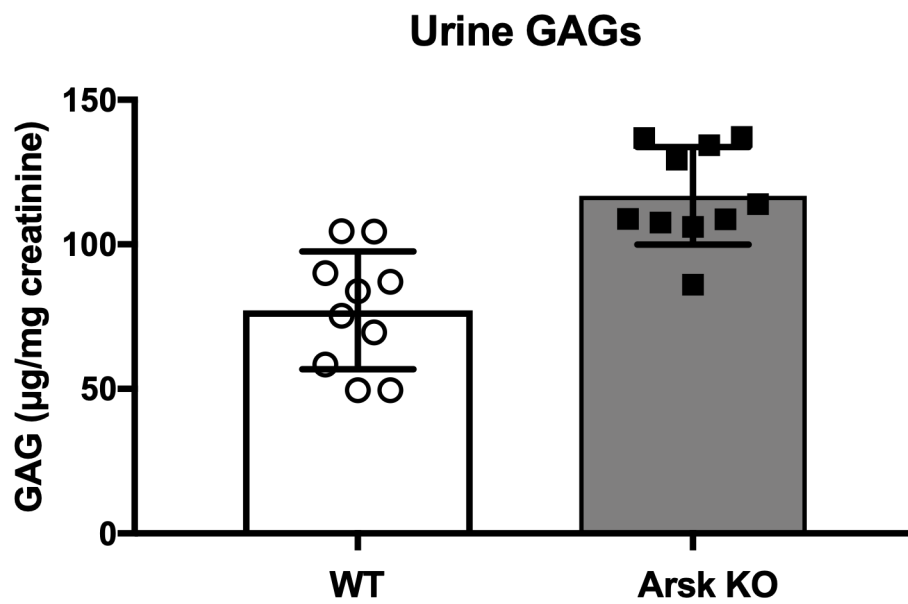

**Suppl. Figure 1: Quantification of urinary GAGs of wildtype (WT) and Arsk-deficient mice (Arsk KO) by Dimethylmethylene Blue Assay (DMMB) and normalized by the creatinine amount. The knockout mice excrete slightly elevated GAG levels within their urine (n=10).**
